# Supplementary material for: Testing Replicability and Generalizability of the Time on Task Effect
Source: MDPI journal article supplement (doi:10.3390/jintelligence11050082), 2023-04-28
Supplement: s1 [file s1]

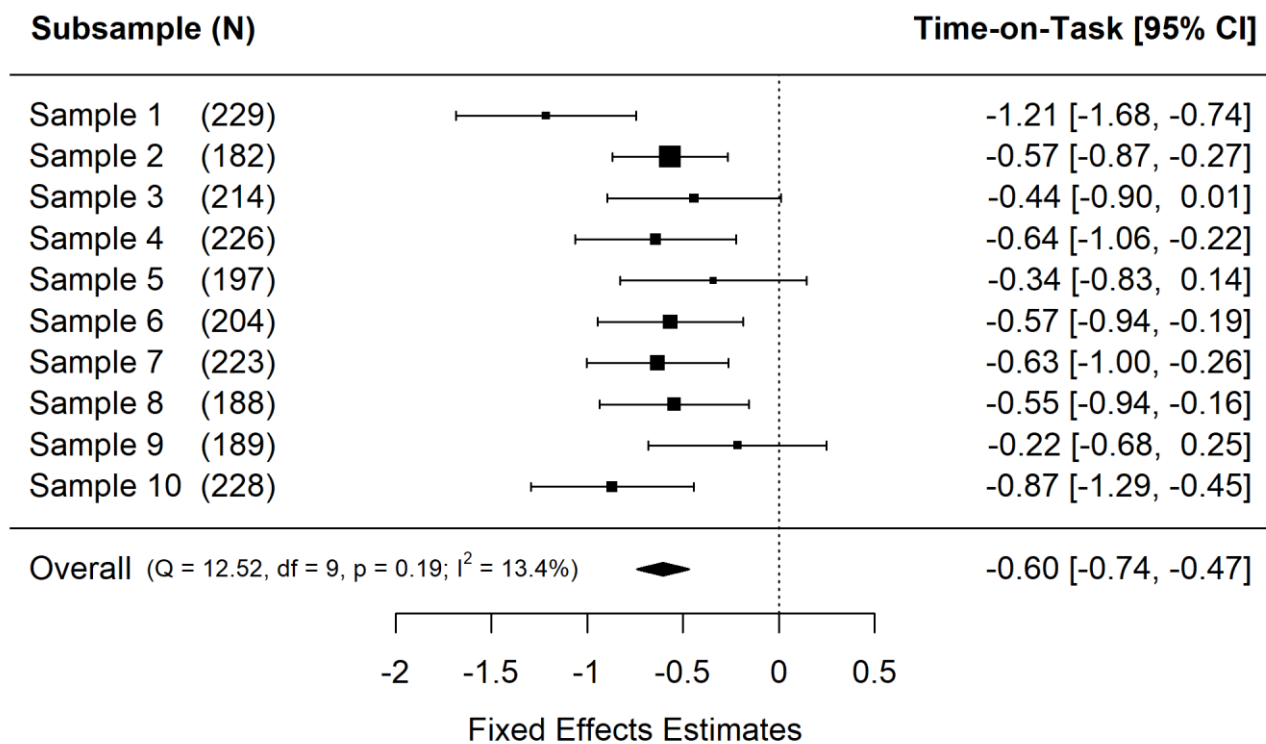

**Figure S1.** Forest plot of time on task estimates for the figural reasoning task. Random effects meta-analysis. Sizes of the 10 samples are given in parentheses. Bars represent 95% confidence interval.
